# Supplementary material for: Sulforaphane Protects against Unilateral Ureteral Obstruction-Induced Renal Damage in Rats by Alleviating Mitochondrial and Lipid Metabolism Impairment
Source: MDPI journal article supplement (doi:10.3390/antiox11101854), 2022-09-20
Supplement: s1 [file s1]

**Table S1.** Antibody list used for Western blot assays.

| <b>Antibody</b>     | <b>Full name</b>                                                                    | <b>Source</b>    | <b># Catalog</b> | <b>Purchased by</b>       | <b>Dilution</b> |
|---------------------|-------------------------------------------------------------------------------------|------------------|------------------|---------------------------|-----------------|
| Anti-KIM1           | Kidney injury molecule                                                              | Goat             | AF3689           | R&D Systems               | 1:5000          |
| Anti-IL-1 $\beta$   | Interleukin-1 beta                                                                  | Armenian Hamster | 503502           | BioLegend                 | 1:5000          |
| Anti- $\alpha$ -SMA | Alpha-smooth muscle actin                                                           | Rabbit           | GTX10034         | Genetex                   | 1:2000          |
| Anti-Col IV         | Collagen IV                                                                         | Mouse            | SAB4200500       | Sigma aldrich             | 1:1000          |
| Anti-PGC-1 $\alpha$ | Peroxisome proliferator-activated receptor-gamma coactivator (PGC)-1alpha           | Rabbit           | AB3242           | Sigma aldrich             | 1:2000          |
| Anti-NRF1           | Nuclear respiratory factor 1                                                        | Rabbit           | 46743            | Cell Signaling Technology | 1:2000          |
| Anti-VDAC           | Voltage-dependent anion channel                                                     | Rabbit           | V2139            | Sigma aldrich             | 1:2000          |
| Anti-ANT            | Adenine nucleotide translocator                                                     | Rabbit           | Ab102032         | Abcam                     | 1:3000          |
| Anti-ACO2           | Aconitase 2                                                                         | Rabbit           | SC-130677        | Santa Cruz Biotechnology  | 1:3000          |
| Anti-OXPHOS         | Total oxidative phosphorylation (OXPHOS) rodent western blot (WB) antibody cocktail | Mouse            | ab110413         | Abcam                     | 1:10000         |
| Anti-DRP1           | Dynamin related protein 1                                                           | Rabbit           | sc-32898         | Santa Cruz Biotechnology  | 1:2000          |
| Anti-OPA1           | Optic atrophy 1                                                                     | Goat             | Sc-30573         | Santa Cruz Biotechnology  | 1:3000          |
| Anti-MFN2           | Mitofusin 2                                                                         | Rabbit           | 9482S            | Cell Signaling Technology | 1:2000          |
| Anti-PINK1          | PTEN-induced kinase 1                                                               | Rabbit           | Ab23707          | Abcam                     | 1:3000          |
| Anti-Parkin         | Parkin                                                                              | Rabbit           | Ab15954          | Abcam                     | 1:2000          |
| Anti-beclin         | Beclin                                                                              | Mouse            | MAB5295          | R&D Systems               | 1:3000          |
| Anti-Bcl2           | B-cell lymphoma 2                                                                   | Rabbit           | 14-6992-82       | Thermo fisher scientific  | 1:2000          |
| Anti-p62            | Sequestosome                                                                        | Rabbit           | P0067            | Sigma Aldrich             | 1:3000          |
| Anti-LC3            | Microtubule-associated proteins 1A/1B light chain 3                                 | Rabbit           | L7543            | Sigma Aldrich             | 1:3000          |
| Anti-CD36           | Cluster of differentiation 36                                                       | Rabbit           | GTX55559         | Genetex                   | 1:1000          |

|                     |                                                  |        |           |         |        |
|---------------------|--------------------------------------------------|--------|-----------|---------|--------|
| Anti-PPAR- $\alpha$ | Peroxisome proliferator-activated receptor-alpha | Rabbit | Ab24509   | Abcam   | 1:2000 |
| Anti-CPT1           | Carnitine palmitoyltransferase I                 | Rabbit | Ab234111  | Abcam   | 1:2000 |
| Anti-FASN           | Fatty acid synthase                              | Rabbit | GTX109833 | Genetex | 1:1000 |
| Anti-DGAT1          | Diacylglycerol O-acyltransferase 1               | Rabbit | GTX48577  | Genetex |        |
| Anti-SREBP1         | Sterol regulatory-element binding protein 1      | Rabbit | GTX79299  | Genetex | 1:1000 |
| Anti-GAPDH          | Glyceraldehyde 3-phosphate dehydrogenase         | Mouse  | Ab8245    | Abcam   | 1:5000 |
